# Supplementary material
Source: Research Square preprint supplement (doi:10.21203/rs.3.rs-9584763/v1)
Supplement: Supplementary file 1 [file 0d37eb529cb0de6a8142ff53.docx]

**Supplementary materials for “Revisiting core structure and energy of screw dislocations in α-quartz”**

Ikuchi Funahashi1,*, Ryo Kobayashi2, Satoshi Ohmura3, and Kenji Kawai1

1 The University of Tokyo, 7-3-1 Hongo Bunkyo-ku, Tokyo, Japan

2 Nagoya Institute of Technology, Gokiso-cho, Showa-ku, Nagoya, Aichi, Japan

3 Ehime University, 2-5 Bunkyo-cho, Matsuyama, Ehime, Japan

**Table S1** List of simulation systems used in this study. The notation of dislocation types follows Heggie and Nylén (1984)

| Number | Dislocation line  direction | Dipole spacing (Å) | Dislocation type 1 | Dislocation type 2 |
| --- | --- | --- | --- | --- |
| 1 |  | 400 | BSH+ | BSH− |
| 2 |  | 400 | BST+ | BST− |
| 3 |  | 400 | BSD+ | BSD− |
| 4 |  | 300 | BSH+ | BSH− |
| 5 |  | 300 | BST+ | BST− |
| 6 |  | 300 | BSD+ | BSD− |
| 7 |  | 400 | BSH+ | BST− |
| 8 |  | 400 | BST+ | BSH− |
| 9 |  | 400 | PSH+ | PSH− |
| 10 |  | 400 | PST+ | PST− |
| 11 |  | 300 | PSH+ | PSH− |
| 12 |  | 300 | PST+ | PST− |
| 13 |  | 400 | PSH+ | PST− |
| 14 |  | 400 | PST+ | PSH− |


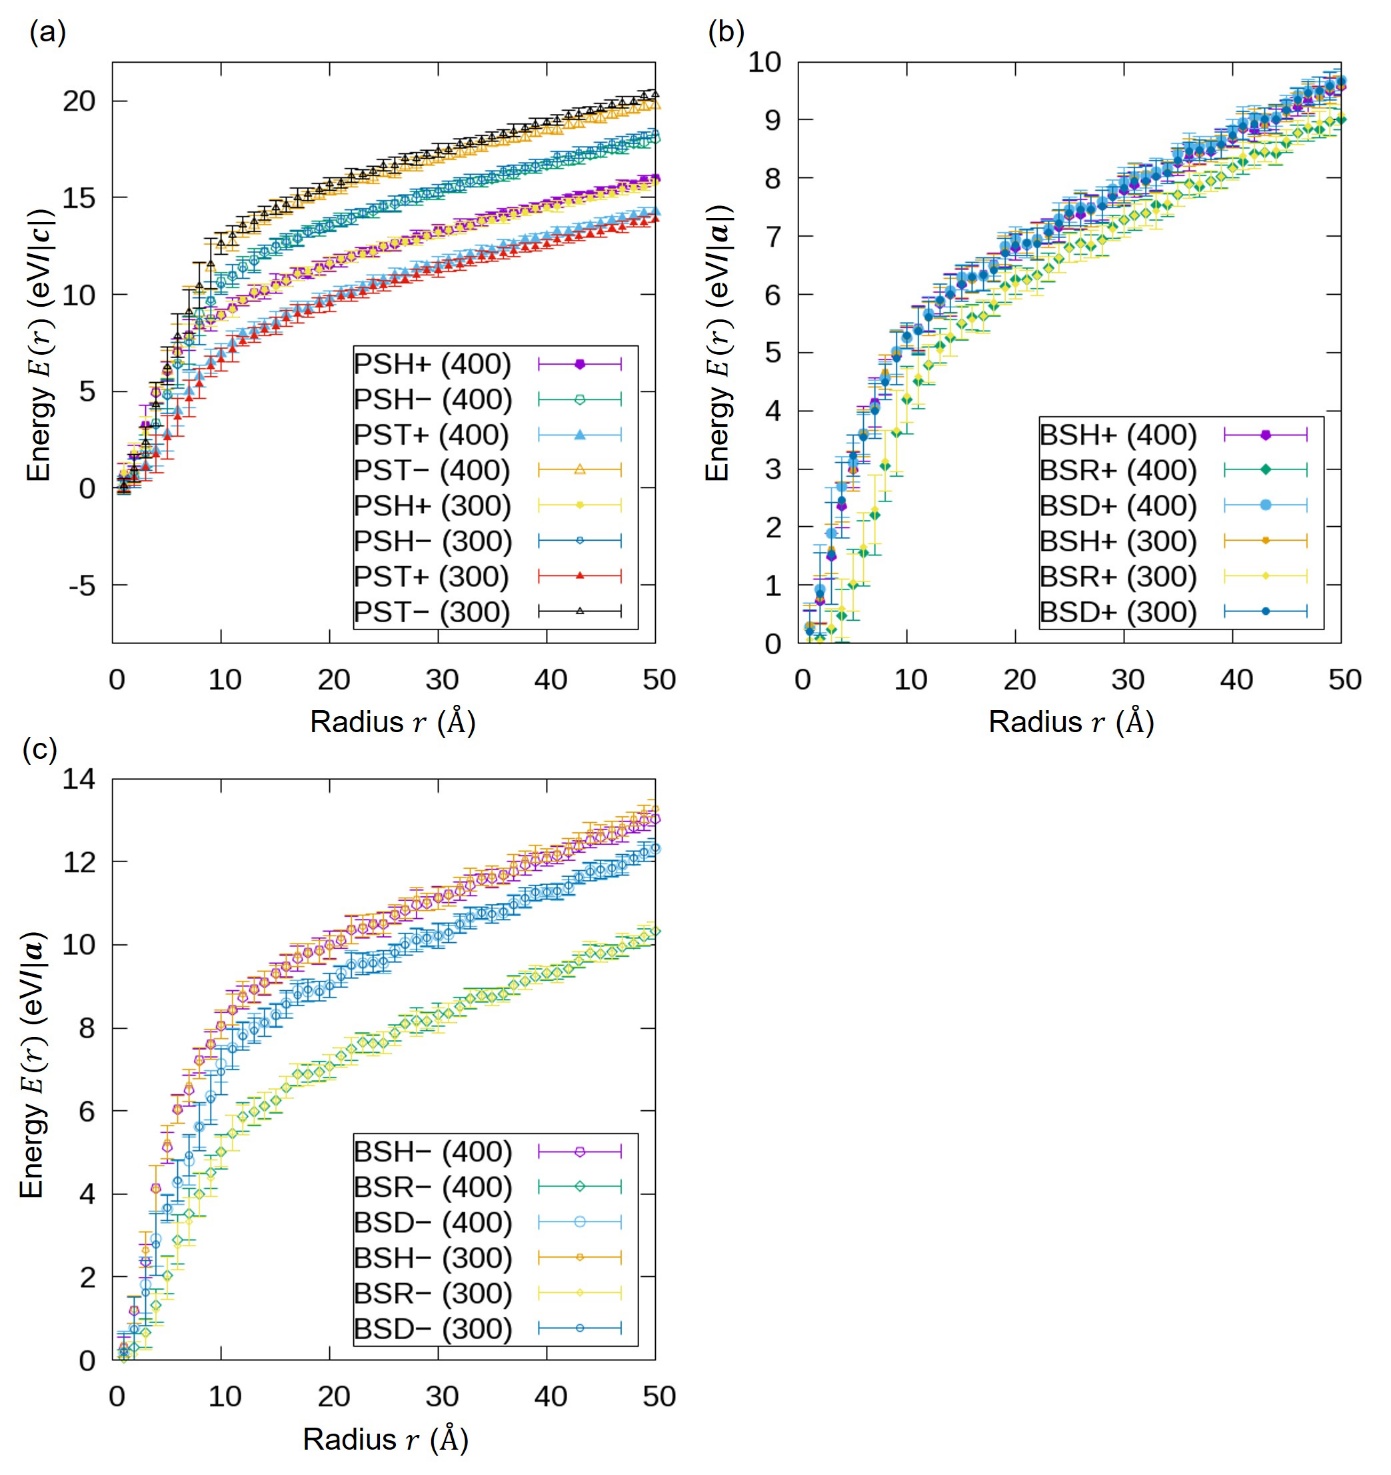


**Fig. S1** Comparison of energy-radius profiles for full-sized and reduced-spacing systems, with dipole spacings of roughly 400 Å and 300 Å, respectively. These profiles are presented in the same manner as those of Figure 2 in the main text. (a) Profiles for dislocations along the -axis. (b) Profiles for dislocations with Burgers vector parallel to the -axis. (c) Profiles for dislocations with Burgers vector antiparallel to the -axis
